# Supplementary material for: Spontaneous osteogenic differentiation of mesenchymal stem cells on electrospun nanofibrous scaffolds
Source: Royal Society of Chemistry journal article supplement (doi:10.1039/c5ra22578g), 2016-01-01
Supplement: c5ra22578g1.pdf [file c5ra22578g1.pdf]

## Electronic Supplementary Information (ESI) for *RSC Advances*.

### Spontaneous Osteogenic Differentiation of Mesenchymal Stem Cells on Electrospun Nanofibrous Scaffolds

Ning Zhang, Qian-Ru Xiao, Xin-Yao Man, Hai-Xia Liu, Lan-Xin Lü and Ning-Ping Huang\*

State Key Laboratory of Bioelectronics, School of Biological Science and Medical Engineering, Southeast University,

Nanjing, 210096, P. R. China

E-mail: [nphuang@seu.edu.cn](mailto:nphuang@seu.edu.cn).

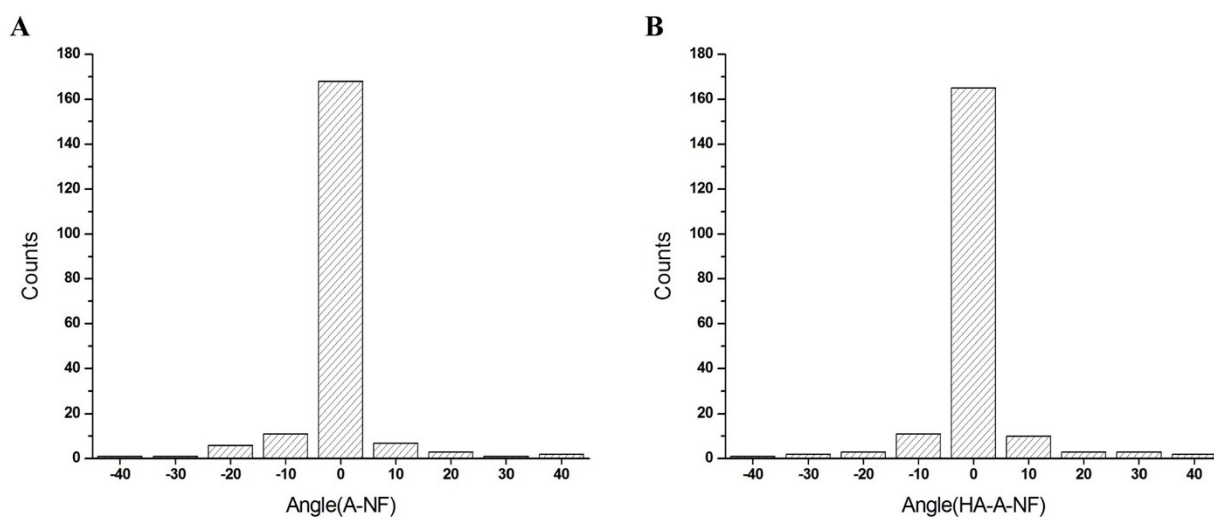

Fig. S1† The parallel degree of the aligned fibers, (A) A-NF and (B) HA-A-NF.

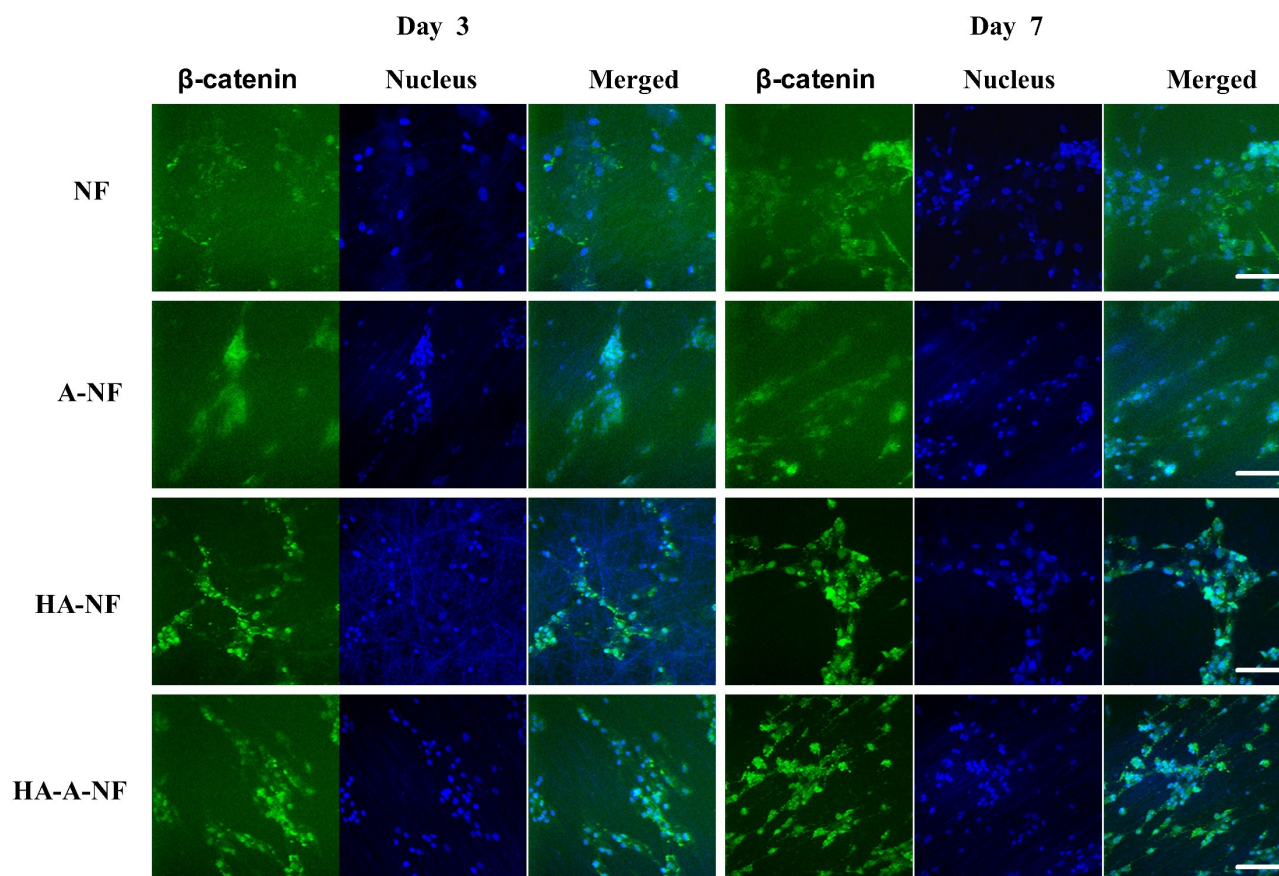

Fig. S2† Immunostaining of total  $\beta$ -catenin (in green) and nucleus (in blue) after MSCs were cultured on different PHBV nanofibers for 3 and 7 days. Scale bars: 100 $\mu$ m.

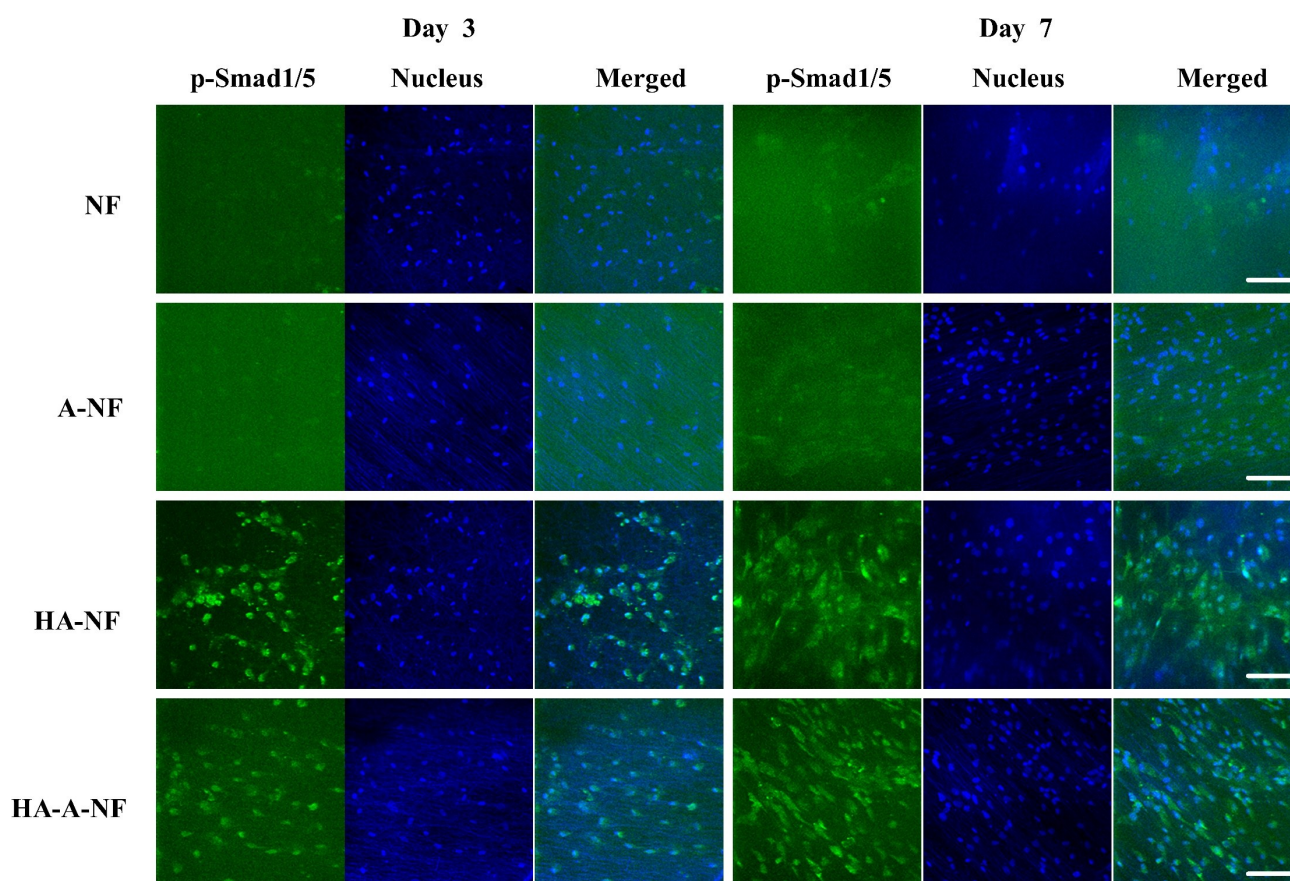

Fig. S3† Immunostaining of p-Smad1/5 (in green) and nucleus (in blue) after MSCs were cultured on different PHBV nanofibers for 3 and 7 days. Scale bars: 100 $\mu$ m.

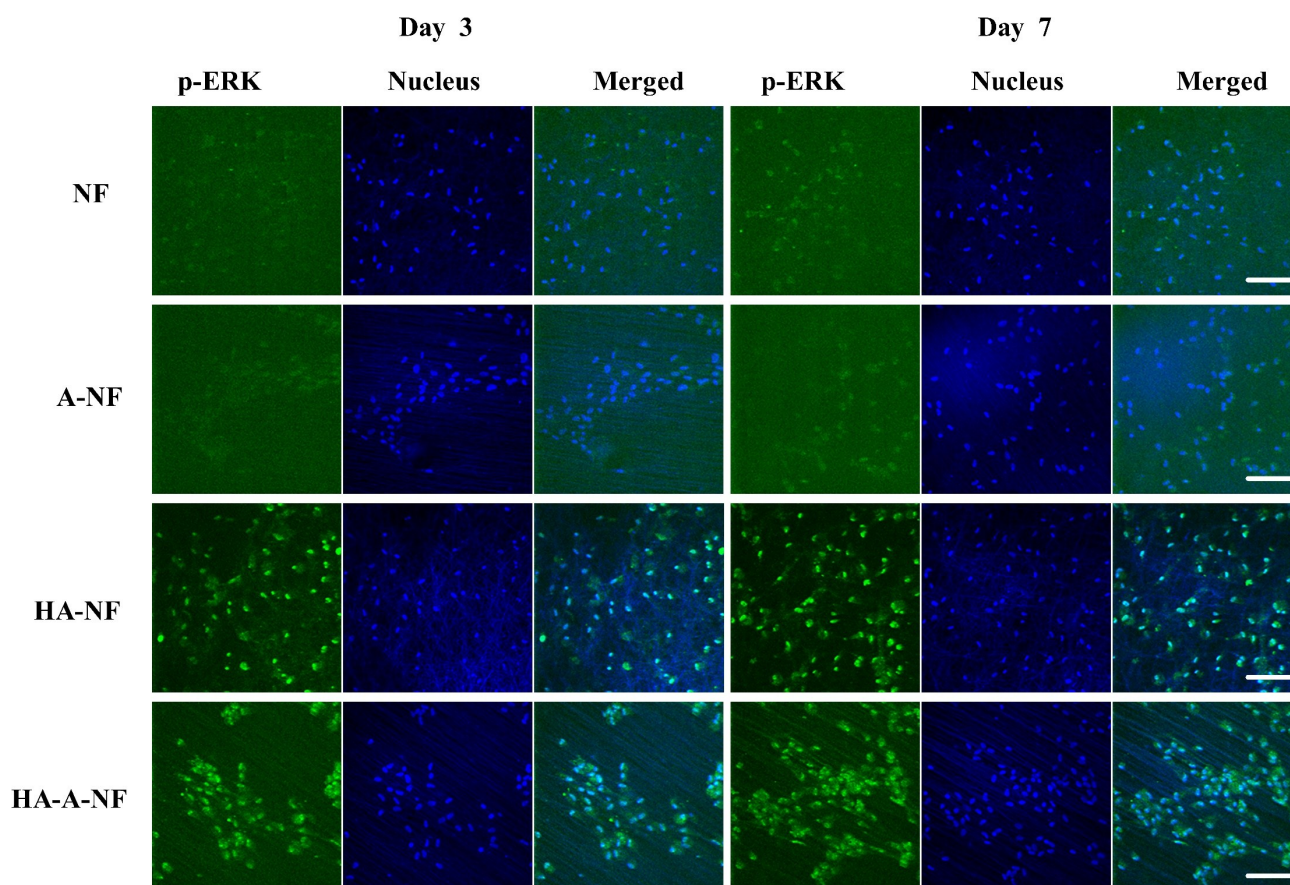

Fig. S4† Immunostaining of p-ERK (in green) and nucleus (in blue) after MSCs were cultured on different PHBV nanofibers for 3 and 7 days. Scale bars: 100 $\mu$ m.

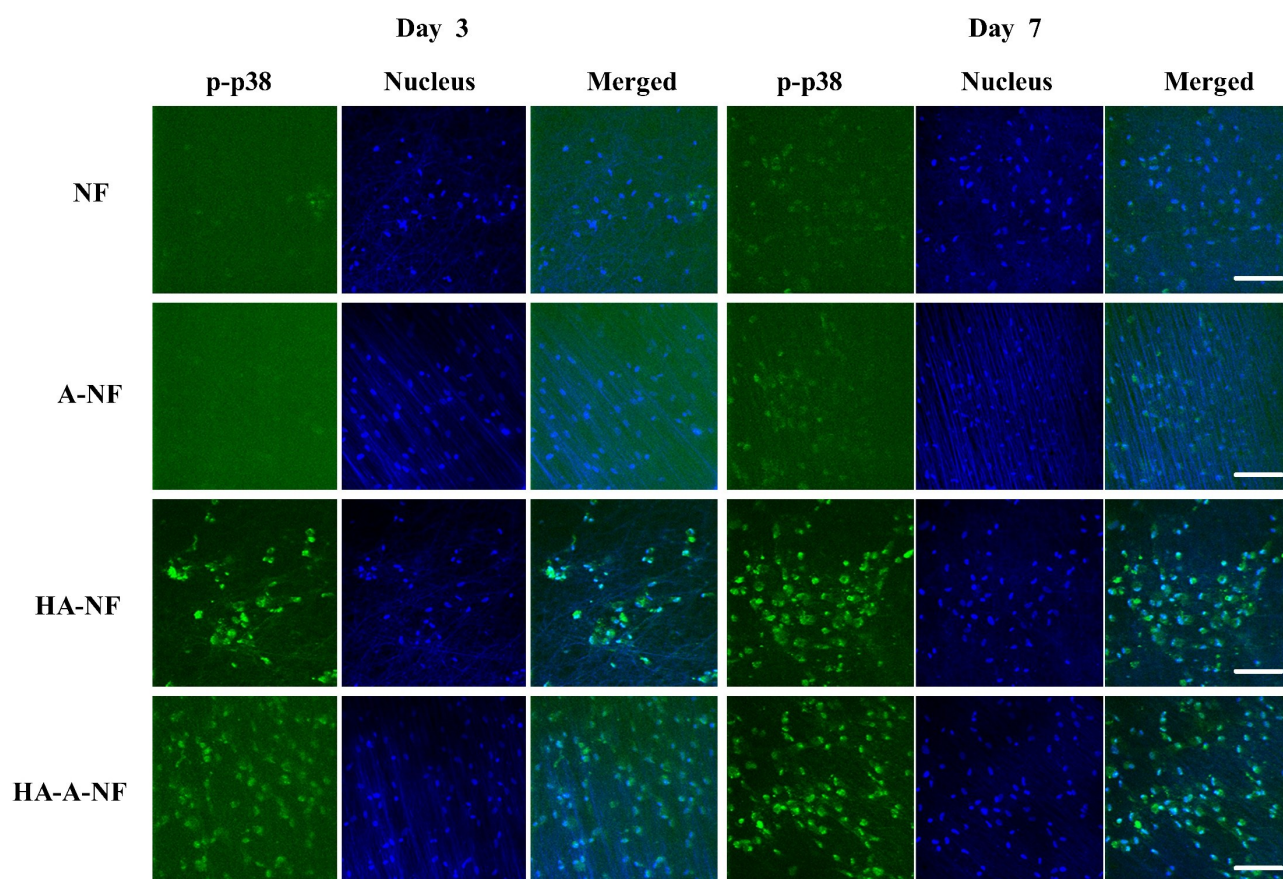

Fig. S5† Immunostaining of p-p38 (in green) and nucleus (in blue) after MSCs were cultured on different PHBV nanofibers for 3 and 7 days. Scale bars: 100 $\mu$ m.
